# Supplementary material
Source: PubMed Central journal article supplement (PMC5667564)
Supplement: NIHMS867794-supplement-Supplemental_materials.pdf [file NIHMS867794-supplement-Supplemental_materials.pdf]

1 **SUPPLEMENTAL MATERIAL**

2  
3 **Post-stroke shh agonist treatment improves functional recovery by enhancing**  
4 **neurogenesis and angiogenesis**

5 Yongming Jin<sup>1</sup>, PhD, Austin Barnett<sup>1#</sup>, BS, Yifan Zhang<sup>2#</sup>, PhD, Xin Yu<sup>2</sup>, ScD, Yu Luo<sup>1\*</sup>, PhD

6 <sup>1</sup>Department of Neurological Surgery, Case Western Reserve University, Cleveland, USA

7 <sup>2</sup>Department of Biomedical Engineering, Case Western Reserve University, Cleveland, USA

8  
9 Correspondence to

10 \*Yu Luo, PhD, Department of Neurological Surgery, Case Western Reserve University, 2109

11 Adelbert Rd, Cleveland, OH, USA. Email: [yxl710@case.edu](mailto:yxl710@case.edu), Phone: 01-216-368-4169,

12 #, These authors contributed equally to this manuscript.

13 Cover title: shh agonist enhances post-stroke recovery

14

15

16

17

18

19

20

21

22 *Supplemental methods:*

23 *Animals:* All animal protocols were conducted under National Institutes Health (NIH) Guidelines  
24 using the NIH handbook *Animals in Research* and were approved by the Institutional Animal Care  
25 and Use Committee (Case Western Reserve University). The mice were housed in the animal  
26 facility of Case Western Reserve University on a 12-h light/dark diurnal cycle. Food was provided  
27 *ad libitum*. Male C57BL/6 mice (10-12 weeks old) were used in this study. To evaluate  
28 neurogenesis in stroke mice, the nestin-CreERT2-R26R-YFP strain was used in this study. The  
29 generation and characterization of animals used in this study were previously described <sup>1,2</sup>.

30 All the experimental groups are randomized and all outcome analysis was carried out by  
31 independent study team members blinded to the treatment condition. Details on experimental  
32 timeline, randomization and blinding of groups, animal numbers for each experiment, and survival  
33 rate/exclusions due to death are included in individual sections below.

34 *Locomotor function:* 28 mice were subjected to MCAo. All of the mice were subjected to Laser  
35 Doppler monitor, mice that did not have at least 80% of blood supply drop or without > 60 %  
36 reperfusion were excluded (n=2). On post-stroke day 3, the remaining 26 mice were subjected to  
37 a one-hour locomotion behavioral test in the automatic behavioral chambers. Mice were assigned  
38 into two equal groups according to their locomotion measurements. There is no difference in any  
39 the parameters measured in the two groups before or at post-stroke day 3 after MCAo  
40 (Supplemental TableI). The two groups were randomly assigned to either receive vehicle treatment  
41 or SAG treatment starting from post-stroke day 3 for 6 consecutive days. Locomotor function was  
42 measured in two animal groups again on post-stroke day 7, 21 and 30 after which animals were  
43 perfused and brains harvested. There were 3 more mice excluded (1 in vehicle and 2 in SAG-

44 treated group) due to death before the completion of the experiments on post-stroke day 30. Total  
45 of 12 vehicle-treated and 11 SAG-treated mice were used to analyze the final locomotor function  
46 data. Brain sections were used in subsequent immunostaining analysis as described in the  
47 following.

48 *Cognitive function:* Total of 36 mice were subjected to MCAo surgery, 4 mice died before the  
49 treatment started (post-stroke day 3). 32 mice were randomly assigned into 2 groups which  
50 received either vehicle or SAG starting post-stroke day 3 for 6 days. 4 mice from the vehicle and  
51 2 mice from the SAG groups died before the test of Barnes maze on post-stroke day 30, resulting  
52 in a final of n=12 for vehicle and n=14 for SAG-treated groups for this behavioral test. To evaluate  
53 the effect of SAG treatment on Barnes maze performance on control mice, mice received SAG or  
54 vehicle treatment (10mg/kg for 6 days, n= 9 for each group) without surgery and were subjected  
55 to Barnes Maze test 21 days later.

56 *MRI study:* A subset of 18 mice randomly selected from the 36 mice described above in Barnes  
57 maze experiment received MRI at 2 days after MCAo and 3 mice died during the course of this  
58 experiment and 2 mice were excluded for further study because the MCAo volume is > than 60%  
59 of the half hemisphere on day2 after MCAo (average ischemic volume =  $33.34 \pm 3.53\%$ ). The  
60 remaining 14 mice were randomly assigned into 2 groups (there is no difference in the ischemic  
61 volume between the two groups, vehicle =  $33.954 \pm 4.20\%$ , SAG group =  $32.64 \pm 6.7\%$ , t-test  
62  $p=0.868$ ). 7 mice received vehicle treatment and 7 mice received SAG treatment from post-stroke  
63 day 3 for 6 days. These final 14 mice received a second MRI scanning for T2 and CBF on day  
64 30 after stroke.

65 *Neurogenesis evaluation:* 20 Nestin<sup>cre</sup>-ERT2-YFP mice were treated with TAM to induce YFP  
66 labeling of SVZ and SGZ NSCs as described in detail below. MCAo was induced in all 20 mice  
67 and 4 mice died before post-stroke day 3. 16 mice were randomly grouped into vehicle or SAG  
68 group and n=7 in each group survived till post-stroke day 30. Brain were harvested and analyzed  
69 for YFP, DCX and NeuN expression as described below.

70 *BrdU pulse labeling:* To evaluated whether SAG treatment affect NSCs proliferation in post-stroke  
71 mice., 20 mice were subjected to MCAo and 1 mouse was excluded due to lack of CBF drop. In  
72 the remaining 19 mice, 3 mice died before post-stroke day 3. The remaining 16 mice were assigned  
73 randomly into 2 groups each received either vehicle or SAG. 2 additional mice (1 in vehicle and  
74 1 in SAG group) died before post-stroke day 7 when the mice were harvested (n=7 for each group).  
75 Mice received post-stroke vehicle or SAG treatment for 4 days from post-stroke day 3 and BrdU  
76 was injected on post-stroke day 6 (twice 0.1ml/10g BrdU labeling solution, Life technologies). All  
77 mice were perfused on post-stroke day 7 to evaluate cell proliferation by BrdU, PCNA or Ki67  
78 immunostaining as described below.

79 *Murine Model of Transient Focal Ischemia:* Transient MCAo was induced in male 10-12 week  
80 old C57/BL6 mice (Jackson Laboratory, Bar Harbor, Maine USA) or male Nestin<sup>cre</sup>ERT2-YFP  
81 mice (C57/BL6 congenic background, 10-12 week old) mice as described <sup>3</sup>. Briefly, transient  
82 MCAo was induced by an intraluminal suture method. Mice were anaesthetized with isoflurane  
83 and a midline neck incision was made to expose the right common carotid artery (rCCA). The  
84 isolated rCCA was temporarily ligated with a silk suture during whole period of occlusion. The  
85 right external carotid artery (rECA), and the right internal carotid artery (rICA) were also isolated  
86 by dissection of fascia. The rICA was clamped with an artery clamp above a loose suture tie around  
87 rICA. The rECA was ligated and cut to make a rECA stump. A nylon filament suture with a silicon

88 coated tip (Docol co, Sharon, MA, USA) was inserted in rECA stump and further pushed along  
89 the lumen of ICA while the clamp was released and then the tie around rICA was tighten. After  
90 35 minutes of occlusion, the nylon suture was gently removed from rMCA to reperfuse the rMCA  
91 territory. The rECA stump was permanently ligated and the temporary ligation in rCCA and rICA  
92 were removed to allow normal blood flow to the brain. During the surgery, mice were placed above  
93 a temperature controlled heating blanket and after the 35 minute occlusion, the skin wound was  
94 closed with suture and the mice were placed in a heated animal intensive care unit chamber until  
95 recovery. To ensure consistent and successful blockage of MCA, we monitored ischemia in all of  
96 our animals by Laser Doppler flowmetry (PeriFlux System 5000, Perimed, Järfälla-Stockholm,  
97 Sweden).

98 *Tamoxifen administration:* Male nestin-CreERT2-R26R-YFP mice (8-10 weeks old) were given  
99 tamoxifen dissolved in 10% EtOH/90% sunflower oil by gavage feeding at a dose of 180 mg/kg  
100 daily for 5 consecutive days. This dosing regimen was previously demonstrated to provide  
101 maximal recombination with minimal mortality and successfully monitored the activated SVZ  
102 NSCs by stroke <sup>1,2,4</sup>. For NSC fate mapping, TAM treated mice received MCAo surgery 10 days  
103 after the last TAM administration and mice were perfused at 30 days post stroke to harvest brain  
104 for immunostaining. The time frame was chosen to specifically to label NSCs in adult mice before  
105 the introduction of MCAo but also allow the clearance of TAM from mice at the time of MCAo  
106 to prevent labeling of reactive astrocytes which also upregulate nestin expression after stroke.

107 *Behavioral assay:* Locomotor function: Animals were placed in an Accuscan activity monitor  
108 (Columbus, OH, USA) one day before and 7, 21 and 28 days after MCAo for behavioral recording  
109 for 23 hours as previously described <sup>5</sup>. On post-stroke day 3, animals were monitored in the  
110 chambers for one hour to assign them into two equal groups before treatments started. The monitor

111 contained 16 horizontal and 8 vertical infrared sensors spaced 2.5 cm apart. Each animal was  
112 placed in a 42×42×31 cm Plexiglas open box for 60 min or 23 hours with food and water supply.  
113 Motor activity was calculated using the automated Versamax software (Accuscan, Columbus, OH,  
114 USA). The following variables were measured: (A) horizontal activity (the total number of beam  
115 interruptions that occurred in the horizontal sensors), (B) total distance traveled (the distance, in  
116 centimeters, traveled by the animals), (C) total movement number (the total number discrete  
117 horizontal movements), (D) total movement time (the total time, in seconds, that animals are  
118 moving), (E) Vertical activity (the total number of beam interruptions that occurred in the vertical  
119 sensors) and (F) vertical movement number (the total number discrete vertical movements). This  
120 behavioral test is automatically monitored by the computer and software therefore avoided  
121 observer bias.

122 *Barnes maze test:* Barnes Maze (Stoelting company, Wood Dale, IL, USA) was used to test mouse  
123 spatial memory at post-stroke week 4. A 91.5–cm diameter circular platform with 20 holes along  
124 the perimeter was placed at 91.5 cm above the ground. Mice were discouraged to idle around  
125 aimlessly by blowing fans and a bright light above the platform. Mice were trained for 4 trials in  
126 2 sessions on the day before testing trail to locate the escape tunnel placed under one of the holes.  
127 One trial was run on the testing day and the test was video-taped till the mouse getting into the  
128 escaping hole or stopped at 5 minutes when the mouse could not locate the escaping hole. Time  
129 spent to locate the escaping hole and error numbers in finding the hiding hole made by the mouse  
130 were read from the video by an observer who was blinded to the treatment groups.

131 *MRI method:* Two imaging sessions were repeated at 2 and 30 days after stroke by staff that were  
132 blinded to the treatment groups.

133 MRI studies were performed on a horizontal Bruker 9.4 T scanner with a 3-cm birdcage coil.  
134 Multi-slice, T<sub>2</sub>-weighted, axial images were acquired using a rapid acquisition with relaxation  
135 enhancement (RARE) sequence<sup>6</sup> to quantify ischemic edema volume. Imaging parameters were:  
136 TE/TR, 15/2000 ms; RARE factor, 8; NAV, 4; matrix size, 256×256; slice thickness, 1 mm;  
137 number of slices, 13; field of view (FOV), 2.4×2.4 cm. One Bregma-containing slice was selected  
138 for CBF quantification by arterial spin labeling (ASL). ASL images were acquired with a flow-  
139 sensitive alternating inversion recovery (FAIR) preparation sequence followed by fast imaging  
140 with steady-state precession (FISP) readout<sup>7</sup>. The inversion pulse used a 3-ms hyperbolic secant  
141 adiabatic pulse, with the slice thickness set to three times that of the imaging slice thickness. FISP  
142 acquisition was implemented at 1420 ms following the inversion pulse with the follow parameters:  
143 flip angle, 60°; TR, 2.4 ms; TE, 1.2 ms; NAV, 20; matrix size, 128×128; FOV, 2.4×2.4 cm; slice  
144 thickness, 1.5 mm. A proton density image (M<sub>0</sub>) with no inversion preparation was also acquired.  
145 A T<sub>1</sub>-apparent map with the same spatial resolution was acquired with a FISP-based Look-Locker  
146 sequence with the following parameters: flip angle, 10°; TR, 4.0 ms; TE, 2.0 ms; NAV, 20. T<sub>2</sub> map  
147 of the same slice was also acquired using the Carr-Purcell-Meiboom-Gill sequence with echo times  
148 varying from 30 to 240 ms<sup>8</sup>. Other acquisition parameters were: TR, 500 ms; number of echoes:  
149 16, NAV, 2; matrix size, 180×180.

150 Image reconstruction and analysis were performed offline using in-house developed,  
151 MATLAB-based (Natick, MA, USA) software. ROIs of ischemic edema volume and brain tissue  
152 were drawn from T<sub>2</sub>-weighted images. Consequently, the percentage of ischemic edema volume  
153 was calculated. CBF was calculated using the method proposed by Pell et al<sup>9</sup>, assuming a blood  
154 T<sub>1</sub>-apparent of 2.4 s. CBF in the ischemic edema volume was compared against that in the  
155 contralateral brain.

156 *Immunohistochemistry:* At different time points after stroke, mice were perfused transcardially  
157 with a solution of 4% paraformaldehyde (PFA, pH 7.2) in 0.1 M phosphate buffer (PB, pH 7.2).  
158 Brains were removed from the skull, post-fixed in 4% PFA overnight at 4 °C, and sequentially  
159 transferred to 30% sucrose in 0.1M phosphate buffer, pH 7.2 solutions overnight. Brains were  
160 frozen on dry ice and sectioned on a cryostat to obtain coronal sections of 25 µm in thickness.

161 The sections were then incubated with blocking buffer for one hour. The primary antibodies were  
162 prepared in the blocking buffer and the sections were incubated in the solution overnight. The  
163 antibodies used were rabbit anti-GFP (Green fluorescent protein) (1:1000; Invitrogen), guinea pig  
164 anti-DCX (1:500, Millipore), mouse anti-NeuN (1:500, Millipore), rat anti-BrdU (1:1000, Life  
165 Technologies), mouse monoclonal anti-PCNA (1:400; Dako), rabbit anti-Ki67 (1:1000, Fisher  
166 Scientific), mouse anti- $\alpha$ -SMA (smooth muscle antibody) (1:400, Dako) and rat anti-CD31 (1:200,  
167 Biolegend). For BrdU immunohistochemistry (IHC) staining, sections were incubated in  
168 denaturing solution and 2N HCL before blocking and incubation with primary antibody solution.  
169 For PCNA and  $\alpha$ -SMA IHC staining, sections were subjected to antigen retrieval before blocking  
170 as described previously<sup>10</sup>. After incubation with primary antibody solution, the sections were  
171 washed and incubated for four hours at room temperature in diluted secondary antibody prepared  
172 with blocking solution (secondary antibody conjugated with Alexa 488 or Alexa 555, 1:1000; Life  
173 Technologies, Carlsbad, CA, USA). The slides were then washed with T-TBS and coverslipped.  
174 Images were acquired using an Olympus microscope (Shinjuku, Tokyo, Japan). Omission of  
175 primary or secondary antibodies resulted in no staining and served as negative controls. Group and  
176 treatment information are all blinded to image analyzer.

177 *Quantification of cell proliferation, neurogenesis and angiogenesis:*



178 For cell proliferation evaluation, brains were harvested 24 hours after pulse BrdU labeling on post-  
179 stroke day 6 from both vehicle and SAG-treated (post-stroke day 3-6) mice, and BrdU and PCNA  
180 positive cells were quantified on 3-4 sections per animal using a Leica DM5000B microscope  
181 (Leica Microsystems, Bannockburn, IL) equipped with a motorized stage and Stereo Investigator  
182 image software (MBF Bioscience, Williston, VT). Dorsal and ventricle SVZ were defined as  
183 described. Proliferating cells in the DG of hippocampus were quantified by counting each BrdU  
184 or Ki67 positive cells in at least 5 sections that contained SGZ at similar coronal levels. Both  
185 contralateral and ipsilateral side of the SVZ and the SGZ were quantified. For quantification of  
186 neurogenesis and migration of SVZ NSC-derived cells into striatum and cortex, stereological  
187 quantification of YFP+, DCX+ or NeuN+ cells was achieved using the optical fractionator probe.  
188 A counting area was drawn around the striatum and cortex rear of the infarcted hemisphere with a  
189 SRS (systematic random sampling) grid of 150x150um and a counting frame of 67.2x75um. YFP,  
190 DCX or NeuN labeled cells were individually counted with this method, with a mounted thickness  
191 of 30um and a section interval of 6 for each animal. Typically, 8-10 sections were counted for each  
192 animal. Gundersen coefficients of error for m=1 were all less than 0.10. Determination of the  
193 percentage of co-labeled YFP and DCX cells was achieved by utilizing the optical fractionator  
194 workflow to randomly select counting areas within the striatum to count the DCX+, YFP+, NeuN+  
195 and co-labeled cells within the counting frame of 67.2x75um and a SRS grid of 200x200um until  
196 a minimum of 100 each of DCX+ and YFP+ cells were recorded per animal. Percentage of YFP  
197 positive cells that are DCX positive or NeuN positive was calculated as:  $(100 \times \text{Total number of}$   
198  $\text{double positive cells} / \text{Total number of YFP+ cells})$ . For quantification of angiogenesis,  
199 histological images were acquired using an Infinity3 camera (Lumenera Corp, Ottawa, Ontario,  
200 Canada) and NIKON 80i microscope (Nikon Corp, Tokoyo, Japan). Three to four representative

201 sections from each animal were quantified for the density of arteries or microvessels.  
202 Quantification of arteries in the infarct area were carried out by counting a-SMA positive vessels  
203 as described in <sup>10</sup>. The number of a-SMA positive vessels in the infarct area were quantified by  
204 Nikon NIS-Elements software (Tokoyo, Japan) and averaged from 3 sections. CD31 positive  
205 microvessel density was quantified by first drawing the region of interests at the boarder of infarct  
206 area. CD 31+ blood vessels were then highlighted by using NIS-Elements and the density of  
207 CD31+ blood vessels were automatically calculated by the software and expressed as object area  
208 fraction in the ROI. Four sections near the largest infarct area were quantified and averaged for  
209 each animal. All immunohistochemical measurements were done by blinded observers.

210 RT-PCR: To examine gene expression in SVZ NSCs, additional 16 nestin-CreERT2-R26R-YFP  
211 mice were subjected to MCAo and SAG or vehicle treatment (post stroke day 3-8) and SVZ tissue  
212 microdissected using method described in <sup>11</sup> for quantitative RT-PCR. Total of four mice died after  
213 MCAo before the tissue harvest, resulted a total of 12 mice for RT-PCR experiment. SVZ tissues  
214 were harvested for qRT-PCR analysis at the last day of SAG or vehicle treatment (post stroke day  
215 8). Mice were euthanized and the brains were immediately removed and chilled on ice. The SVZ  
216 of both contralateral and ipsilateral side was dissected and total RNA was extracted following the  
217 instructions from the manufacturer (RNAqueous, Ambion) as described previously <sup>12</sup>. Total RNA  
218 (1 µg) was treated with RQ-1 Rnase-free Dnase I and reverse transcribed into cDNA using random  
219 hexamers by Superscript III reverse transcriptase (Life Sciences). cDNA levels for HPRT1  
220 (hypoxanthine phosphoribosyltransferase 1), Hmbs (hydroxymethylbilane synthase) and various  
221 target genes were determined, using specific universal probe Library primer probe sets (Roche),  
222 by quantitative RT-PCR using a Roche Light Cycler II 480. Relative expression level was  
223 calculated using the delta Ct method compared to Hbms as a reference gene. Primers and 6-

224 carboxyfluorescein (FAM) labeled probes used in the quantitative RT-PCR for each gene are listed  
225 in Supplemental Table III.

226

227

228

229

230

231

232

233

234

235

236

237

238

239

240

241

242

243 Supplemental Tables:

244 Table I. No differences in locomotor parameters in vehicle and shh pathway agonist (SAG) treated mice before and  
245 3 days after stroke.

246

|         | <i>Pre-stroke (23 hrs)</i> |               |             |               |                 | <i>Post stroke day 3 (1hr)</i> |               |             |               |                 |
|---------|----------------------------|---------------|-------------|---------------|-----------------|--------------------------------|---------------|-------------|---------------|-----------------|
|         | <i>vehicle</i>             |               | <i>SAG</i>  |               | <i>*p value</i> | <i>vehicle</i>                 |               | <i>SAG</i>  |               | <i>*p value</i> |
|         | <i>mean</i>                | <i>s.e.m.</i> | <i>mean</i> | <i>s.e.m.</i> |                 | <i>mean</i>                    | <i>s.e.m.</i> | <i>mean</i> | <i>s.e.m.</i> |                 |
| HACTV   | 96088.4                    | 4134.5        | 10219.4     | 5481.4        | 0.44            | 8540.1                         | 1031.6        | 9533.9      | 512.6         | 0.41            |
| TOTDIST | 19982.7                    | 1568.2        | 20612.5     | 1665.8        | 0.74            | 1560.7                         | 250.1         | 1485.9      | 127.5         | 0.80            |
| MOVNO   | 5314.3                     | 247.0         | 5422.4      | 253.6         | 0.76            | 399.2                          | 51.1          | 454         | 22.7          | 0.35            |
| MOVTIME | 2446.1                     | 171.7         | 2532.5      | 181.9         | 0.72            | 206.5                          | 34.4          | 193.6       | 16.9          | 0.75            |
| RESTIME | 83953.9                    | 171.7         | 83867.5     | 181.9         | 0.72            | 3393.5                         | 34.4          | 3406.4      | 16.9          | 0.75            |
| VACTV   | 10894.3                    | 696.7         | 11846.2     | 847.2         | 0.42            | 538.2                          | 95.6          | 606.1       | 90.0          | 0.61            |
| VMOVNO  | 2871.4                     | 207.1         | 3072.2      | 122.0         | 0.33            | 162.5                          | 22.9          | 180.6       | 23.4          | 0.58            |
| VTIME   | 7425.2                     | 344.3         | 7582.2      | 487.3         | 0.81            | 342.5                          | 49.0          | 396.2       | 58.7          | 0.48            |

247

\*p value for difference between vehicle and SAG-treated mice within pre-stroke or post-stroke condition (ANOVA).

248

249

250

251 HACTV (horizontal activity) = total number of beam interruptions that occurred in the horizontal  
252 sensors.

253 TOTDIST (total distance travelled) = the total distance (cm) travelled.

254 MOVNO (number of movements) = the number of separate horizontal movements executed.

255 MOVTIME (movement time) = the amount of time (second) in ambulation.

256 RESTIME (rest time) = the amount of time (second) in rest.

257 VACTV (vertical activity) = total number of beam interruptions that occurred in the vertical sensors.

258 VMOVNO (vertical number of movements) = the number of separate vertical movements executed.

259 VTIME (vertical movement time) = the amount of time (second) in vertical activity.

260

261

262

263

264

265

266 Table II. Differences and p values in locomotor parameters in vehicle and shh pathway agonist (SAG)  
267 treated mice at different post-stroke days.

|         | <i>Post-stroke day 7</i> |             |                 | <i>Post-stroke day 21</i> |             |                 | <i>Post-stroke day 28</i> |             |                 |
|---------|--------------------------|-------------|-----------------|---------------------------|-------------|-----------------|---------------------------|-------------|-----------------|
|         | <i>vehicle</i>           | <i>SAG</i>  | <i>*p value</i> | <i>vehicle</i>            | <i>SAG</i>  | <i>*p value</i> | <i>vehicle</i>            | <i>SAG</i>  | <i>*p value</i> |
|         | <i>mean</i>              | <i>mean</i> |                 | <i>mean</i>               | <i>mean</i> |                 | <i>mean</i>               | <i>mean</i> |                 |
| HACTV   | 74738.8                  | 73841.5     | 0.892           | 73557.5                   | 93034.6     | 0.004           | 87033.0                   | 101051.1    | 0.03            |
| TOTDIST | 10771.1                  | 13296.4     | 0.186           | 11922.7                   | 18644.0     | <0.001          | 14605.3                   | 18350.9     | 0.05            |
| MOVNO   | 3338.7                   | 3779.0      | 0.22            | 3553.8                    | 4974.5      | <0.001          | 4191.5                    | 5020.2      | 0.02            |
| MOVTIME | 1373.5                   | 1685.2      | 0.2             | 1535.2                    | 2431.3      | <0.001          | 1856.8                    | 2372.7      | 0.03            |
| RESTIME | 85026.5                  | 84714.8     | 0.2             | 84864.8                   | 83968.7     | <0.001          | 84543.1                   | 84027.3     | 0.03            |
| VACTV   | 8291.7                   | 9070.6      | 0.5             | 8261.7                    | 10932.2     | 0.02            | 10353.8                   | 10886.2     | 0.65            |
| VMOVNO  | 1984.6                   | 2027.0      | 0.83            | 1975.3                    | 2644.6      | 0.002           | 2408.8                    | 2613.3      | 0.32            |
| VTIME   | 6076.8                   | 6676.7      | 0.35            | 5653.7                    | 7030.9      | 0.03            | 6274.9                    | 6890.3      | 0.34            |

268 \*p value for difference between vehicle and SAG-treated mice at different time point (ANOVA, post-hoc  
269 Bonferroni t-test for repeated measure, pair wire comparison).

270

271 HACTV (horizontal activity) = total number of beam interruptions that occurred in the horizontal sensors.

272 TOTDIST (total distance travelled) = the total distance (cm) travelled.

273 MOVNO (number of movements) = the number of separate horizontal movements executed. MOVTIME  
274 (movement time) = the amount of time (second) in ambulation.

275 RESTIME (rest time) = the amount of time (second) in rest.

276

277 VACTV (vertical activity) = total number of beam interruptions that occurred in the vertical sensors.

278 VMOVNO (vertical number of movements) = the number of separate vertical movements executed.

279 VTIME (vertical movement time) = the amount of time (second) in vertical activity.

280

281

282

283

284

285

286

287 Table III: Primer/ probe sets used in qRT-PCR.

288

| <b>Primer/probe set:</b> |                 |                                            |
|--------------------------|-----------------|--------------------------------------------|
| Hmbs:                    | Forward Primer: | 5'-TCC CTG AAG GAT GTG CCT AC-3'           |
|                          | Reverse Primer: | 5'-ACA AGG GTT TTC CCG TTT G-3'            |
|                          | Probe:          | Universal Probe Library: Probe 79 - Roche  |
| HPRT1:                   | Forward Primer: | 5'-TGA TAG ATC CAT TCC TAT GAC TGT AGA-3'  |
|                          | Reverse Primer: | 5'- AAG ACA TTC TTT CCA GTT AAA GTT GAG-3' |
|                          | Probe:          | Universal Probe Library: Probe 22 - Roche  |
| smo                      | Forward Primer: | 5'- GCA AGC TCG TGC TCT GGT-3'             |
|                          | Reverse Primer: | 5'- GGG CAT GTA GAC AGC ACA CA-3'          |
|                          | Probe:          | Universal Probe Library: Probe 3 - Roche   |
| Gli1                     | Forward Primer: | 5'-CTG ACT GTG CCC GAG AGT G-3'            |
|                          | Reverse Primer: | 5'-CGC TGC TGC AAG AGG ACT-3'              |
|                          | Probe:          | Universal Probe Library: Probe 84 - Roche  |

289

290

291

292 Supplemental Figures:

A Total striatal YFP+/NeuN+ cells (ipsilateral side)

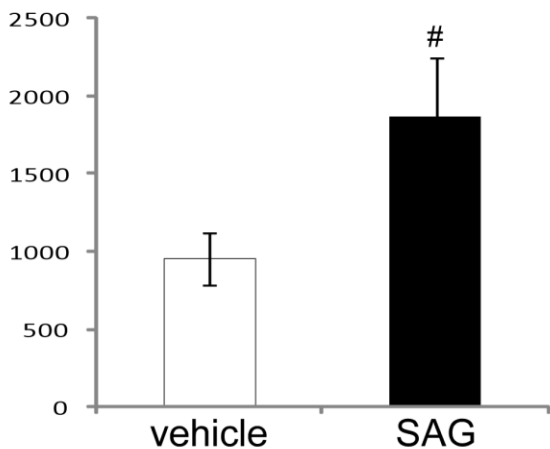

B Hippocampal YFP+/NeuN+ cells

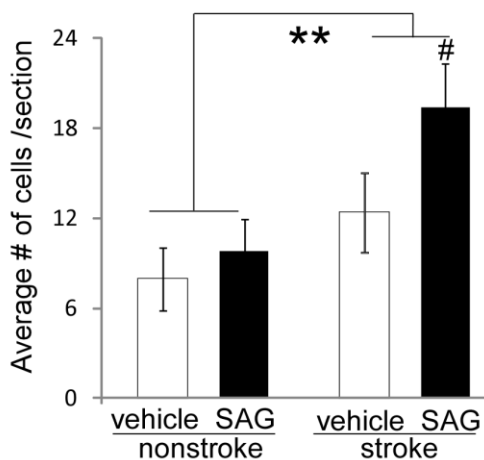

293

294 Supplemental Fig I. Post-stroke SAG treatment increased the number of surviving NSCs derived  
295 NeuN positive cells in both ipsilateral striatum and hippocampus. YFP+ and NeuN+ double  
296 positive cells migrate into striatal and cortical area in ischemic hemisphere in vehicle (open bar)  
297 or SAG (solid bar) treated mice at 30 days post stroke were quantified using StereoInvestigator  
298 and results show (A) SAG increased the total number of YFP/NeuN positive cells (#,  $p < 0.05$ ,  
299 Student's t-test,  $n=7$ ). There is no visible YFP+/NeuN+ cells in the striatal or cortical region in the  
300 contralateral hemisphere. (B) Quantification of YFP+/NeuN+ /YFP+ double positive cells in the  
301 contralateral and ipsilateral side of the hippocampus at 30 days post stroke.  $MEAN \pm SEM$ . \*\*

302 p<0.01, nonstroke vs. stroke. #, p<0.05 compared to vehicle-treated mice, ANOVA. n= 7 each  
303 group.

304

305

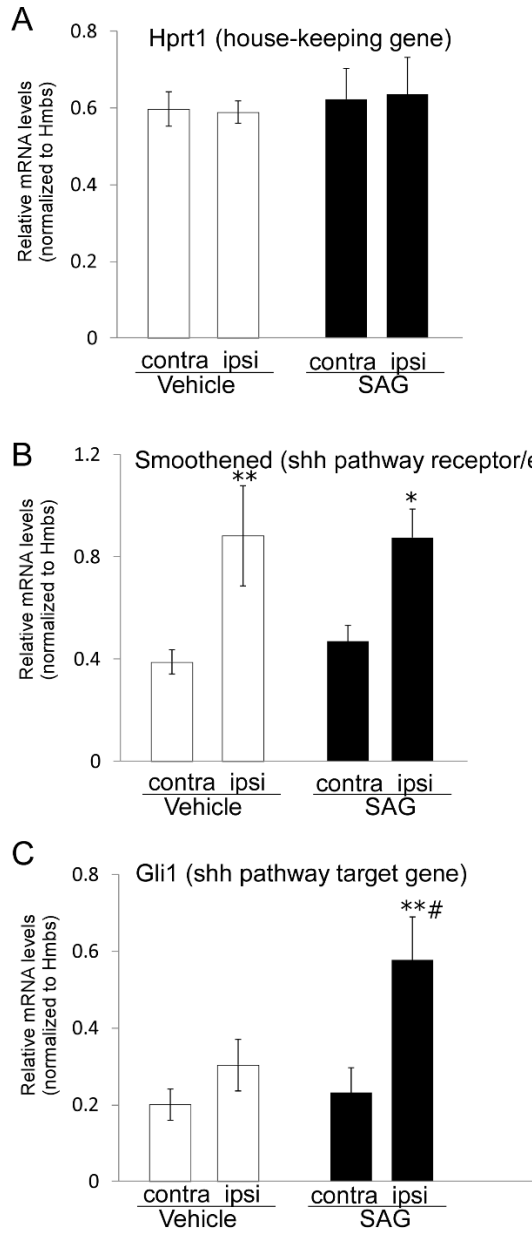

306



307 Supplemental Fig II. **Gene expression alterations in SVZ of stroke mice treated with vehicle or**  
308 **SAG.** Gene expression was analyzed using qRT-PCR after vehicle or SAG treatment in stroke  
309 mice using fluorescent microdissected SVZ tissue. All gene expression levels were normalized to  
310 Hmbs house-keeping gene expression for each sample. (A) There is no difference in expression  
311 levels of a second house-keeping gene Hprt1. (B) Smoothed expression is upregulated in  
312 ipsilateral side of the SVZ in both vehicle and SAG-treated group. (C) In addition, SAG-treated  
313 group showed increased Gli expression levels suggesting in vivo post-stroke SAG treatment at  
314 10mg/kg was able to activate the stroke-induced smoothed receptor and activate downstream  
315 signaling pathway. MEAN $\pm$  SEM. \* or \*\*, p<0.05 or p<0.01 compared to contralateral side, #  
316 indicates p< 0.05 compared to vehicle-treated groups, ANOVA, Student-Newman-Keuls post-hoc  
317 tests. n=5-7)

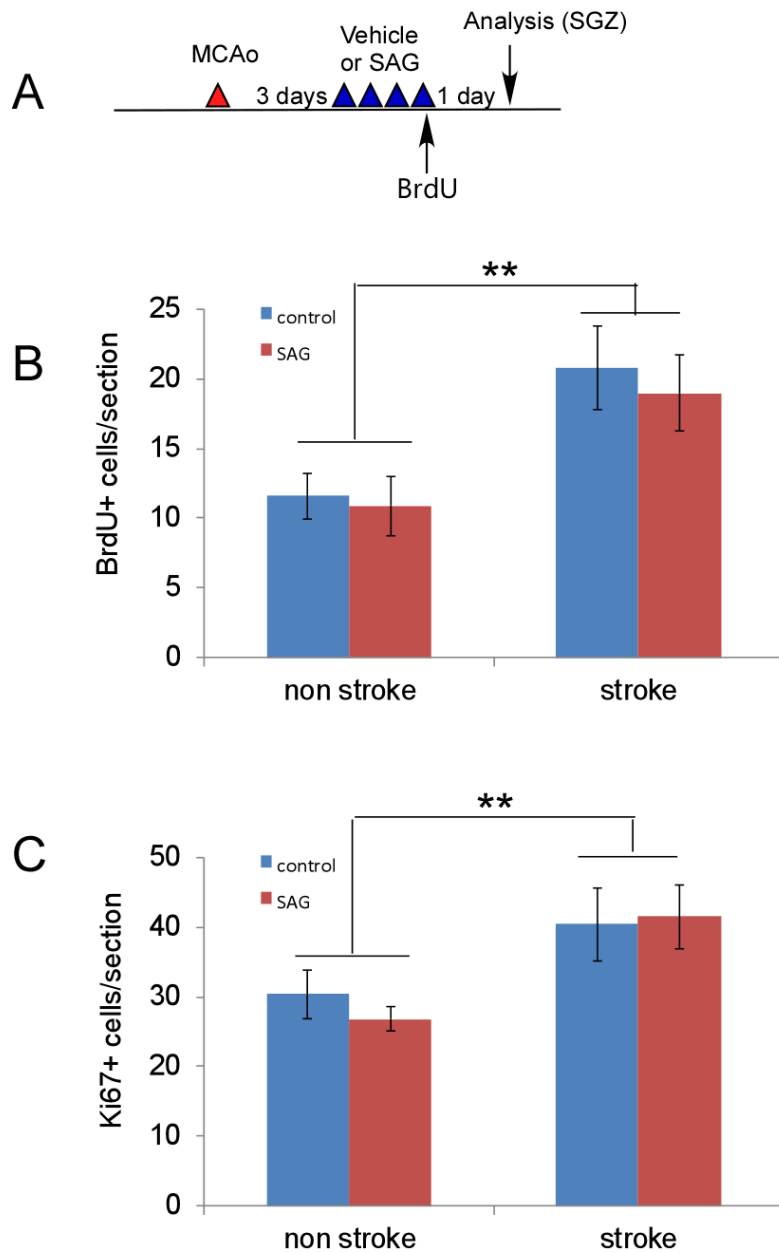

318

319 Supplemental Fig III. SAG post-stroke treatment does not affect the enhanced proliferation of SGZ

320 NSCs in stroke mice. (A). Experimental time line. (B). BrdU + cells and Ki67+ cells in SGZ of

321 hippocampus after stroke. MEAN $\pm$  SEM. \*\*,  $p < 0.01$ , ANOVA. (n=5-7).

322

323

324 Supplemental references:

- 325 1. Lagace DC, Whitman MC, Noonan MA, Ables JL, DeCarolis NA, Arguello AA, et al. Dynamic  
326 contribution of nestin-expressing stem cells to adult neurogenesis. *J Neurosci.* 2007;27:12623-  
327 12629
- 328 2. Jin Y, Raviv N, Barnett A, Bambakidis NC, Filichia E, Luo Y. The shh signaling pathway is upregulated  
329 in multiple cell types in cortical ischemia and influences the outcome of stroke in an animal model.  
330 *PloS one.* 2015;10:e0124657
- 331 3. Longa EZ, Weinstein PR, Carlson S, Cummins R. Reversible middle cerebral artery occlusion  
332 without craniectomy in rats. *Stroke.* 1989;20:84-91
- 333 4. Li L, Harms KM, Ventura PB, Lagace DC, Eisch AJ, Cunningham LA. Focal cerebral ischemia induces  
334 a multilineage cytogenic response from adult subventricular zone that is predominantly gliogenic.  
335 *Glia.* 2010;58:1610-1619
- 336 5. Luo Y, Kuo CC, Shen H, Chou J, Greig NH, Hoffer BJ, et al. Delayed treatment with a p53 inhibitor  
337 enhances recovery in stroke brain. *Annals of neurology.* 2009;65:520-530
- 338 6. Hennig J, Nauwerth A, Friedburg H. Rare imaging: A fast imaging method for clinical mr. *Magnetic  
339 resonance in medicine.* 1986;3:823-833
- 340 7. Gao Y, Goodnough CL, Erokwo BO, Farr GW, Darrah R, Lu L, et al. Arterial spin labeling-fast imaging  
341 with steady-state free precession (asl-fisp): A rapid and quantitative perfusion technique for high-  
342 field mri. *NMR in biomedicine.* 2014;27:996-1004
- 343 8. Chen Y, Li W, Jiang K, Wang CY, Yu X. Rapid t2 mapping of mouse heart using the carr-purcell-  
344 meiboom-gill sequence and compressed sensing reconstruction. *Journal of magnetic resonance  
345 imaging : JMRI.* 2016;44:375-382
- 346 9. Pell GS, Thomas DL, Lythgoe MF, Calamante F, Howseman AM, Gadian DG, et al. Implementation  
347 of quantitative fair perfusion imaging with a short repetition time in time-course studies.  
348 *Magnetic resonance in medicine.* 1999;41:829-840
- 349 10. Liu HS, Shen H, Luo Y, Hoffer BJ, Wang Y, Yang Y. Post-treatment with cocaine- and amphetamine-  
350 regulated transcript enhances infarct resolution, reinnervation, and angiogenesis in stroke rats -  
351 an mri study. *NMR in biomedicine.* 2016;29:361-370
- 352 11. Guo W, Patzlaff NE, Jobe EM, Zhao X. Isolation of multipotent neural stem or progenitor cells from  
353 both the dentate gyrus and subventricular zone of a single adult mouse. *Nature protocols.*  
354 2012;7:2005-2012
- 355 12. Zhou X, Pace J, Filichia E, Lv T, Davis B, Hoffer B, et al. Effect of the sonic hedgehog receptor  
356 smoothed on the survival and function of dopaminergic neurons. *Experimental neurology.*  
357 2016;283:235-245

358

359
